# Supplementary material for: Effects of Different Dietary Carbohydrate Sources on the Meat Quality and Flavor Substances of Xiangxi Yellow Cattle
Source: MDPI journal article supplement (doi:10.3390/ani12091136), 2022-04-28
Supplement: s1 [file s1]

## Supplementary Figure

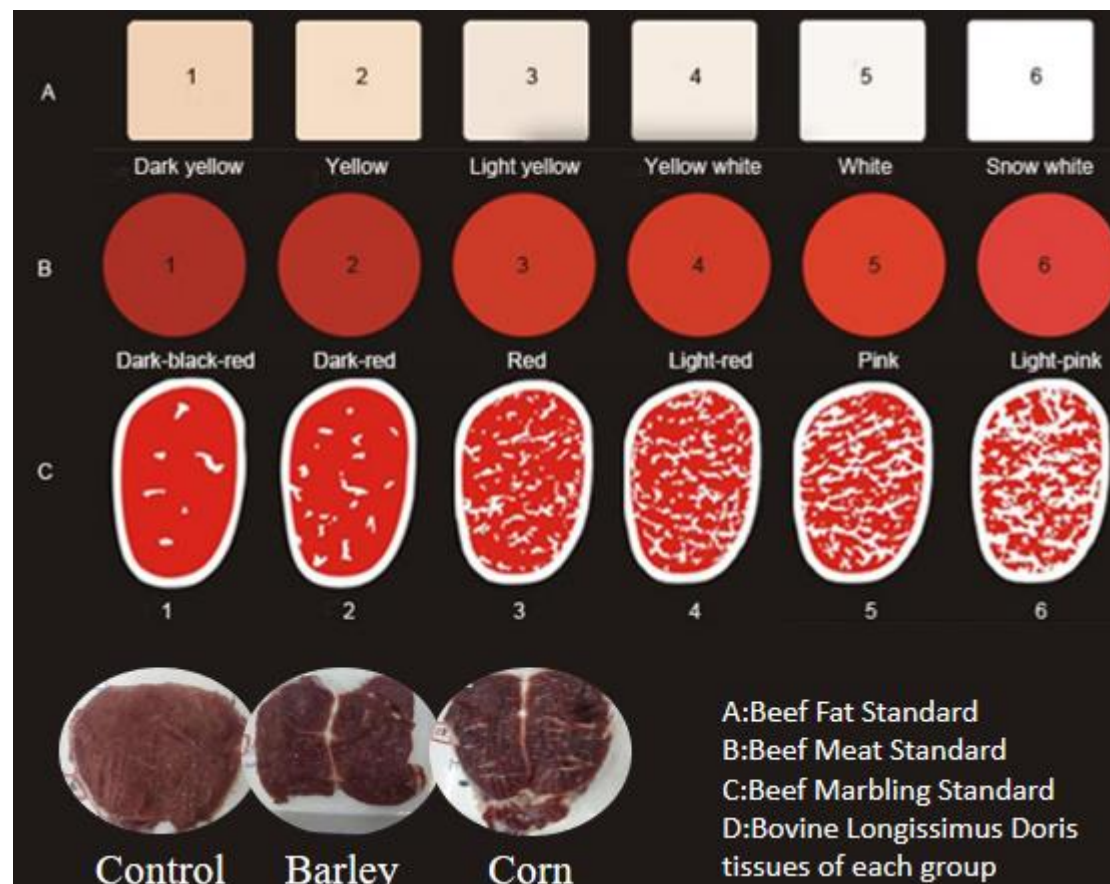

Figure S1: SEUROP classification according to the official Japanese Meat Grading Standards which have been adopted by the Chinese beef cattle industry along with other meat grading standards.
